# Supplementary material for: Dietary Behaviors and Incident COVID-19 in the UK Biobank
Source: MDPI journal article supplement (doi:10.3390/nu13062114), 2021-06-20
Supplement: s1 [file s1]

**Supplemental Table 1: Description of the dietary touchscreen questionnaire and possible responses**

| Computed Variables                    | Question Stem                                                                                                                                                   | Responses                                                                                                                                                         | Hints                                                                                                                                                                                                                                                                                                                                                                |
|---------------------------------------|-----------------------------------------------------------------------------------------------------------------------------------------------------------------|-------------------------------------------------------------------------------------------------------------------------------------------------------------------|----------------------------------------------------------------------------------------------------------------------------------------------------------------------------------------------------------------------------------------------------------------------------------------------------------------------------------------------------------------------|
| Coffee consumption, cups/day          | How many cups of coffee do you drink each DAY?<br>(Include decaffeinated coffee)                                                                                | Enter INTEGER OR<br>Less than one OR<br>Do not know OR<br>Prefer not to answer                                                                                    | Please provide an average considering your intake over the last year. If you are unsure, please provide an estimate or select Do not know.                                                                                                                                                                                                                           |
| Tea consumption, cups/day             | How many cups of tea do you drink each DAY?<br>(Include black and green tea)                                                                                    | Enter INTEGER OR<br>Less than one OR<br>Do not know OR<br>Prefer not to answer                                                                                    | Please provide an average considering your intake over the last year. If you are unsure, please provide an estimate or select Do not know.                                                                                                                                                                                                                           |
| Fruit (fresh/dried), servings/day     | About how many pieces of FRESH fruit would you eat per DAY? (Count one apple, one banana, 10 grapes etc as one piece; put '0' if you do not eat any)            | Enter INTEGER OR<br>Less than one OR<br>Do not know OR<br>Prefer not to answer                                                                                    | Please provide an average considering your intake over the last year. If you are unsure, please provide an estimate or select Do not know                                                                                                                                                                                                                            |
|                                       | About how many pieces of DRIED fruit would you eat per DAY? (Count one prune, one dried apricot, 10 raisins as one piece; put '0' if you do not eat any)        |                                                                                                                                                                   |                                                                                                                                                                                                                                                                                                                                                                      |
| Vegetables (cooked/raw), servings/day | On average how many heaped tablespoons of COOKED vegetables would you eat per DAY? (Do not include potatoes; put '0' if you do not eat any)                     | Enter INTEGER OR<br>Less than one OR<br>Do not know OR<br>Prefer not to answer                                                                                    | Please provide an average considering your intake over the last year. If you are unsure, please provide an estimate or select Do not know. If you have less than one tablespoon a day select Less than one.                                                                                                                                                          |
|                                       | On average how many heaped tablespoons of SALAD or RAW vegetables would you eat per DAY? (Include lettuce, tomato in sandwiches; put '0' if you do not eat any) |                                                                                                                                                                   |                                                                                                                                                                                                                                                                                                                                                                      |
| Oily fish consumption, servings/day   | How often do you eat oily fish? (e.g. sardines, salmon, mackerel, herring)                                                                                      | SELECT one:<br>Never<br>Less than once a week<br>Once a week<br>2-4 times a week<br>5-6 times a week<br>Once or more daily<br>Do not know<br>Prefer not to answer | Please provide an average considering your intake over the last year. If you are unsure, please provide an estimate or select Do not know. Oily fish include: Salmon, Anchovies, Trout, Swordfish, Mackerel, Bloaters, Herring, Cacha, Sardines, Carp, Pilchards, Hilsa, Kipper, Jack fish, Eel, Katla, Whitebait, Orange roughy, Tuna (fresh only), Pangas, Sprats. |
| Processed meat, servings/day          | How often do you eat processed meats (such as bacon, ham, sausages, meat pies, kebabs, burgers, chicken nuggets)?                                               | SELECT one:<br>Never<br>Less than once a week<br>Once a week<br>2-4 times a week                                                                                  | Please provide an average considering your intake over the last year. If you are unsure, please provide an estimate or select Do not know.                                                                                                                                                                                                                           |

|                        |                                                                                |                                                                                                   |                                                                                                                                          |
|------------------------|--------------------------------------------------------------------------------|---------------------------------------------------------------------------------------------------|------------------------------------------------------------------------------------------------------------------------------------------|
|                        |                                                                                | 5-6 times a week<br>Once or more daily<br>Do not know<br>Prefer not to answer                     |                                                                                                                                          |
| Red meat, servings/day | How often do you eat beef? (Do not count processed meats)                      | SELECT one:<br>Never                                                                              | Please provide an average considering your intake over the last year If you are unsure, please provide an estimate or select Do not know |
|                        | How often do you eat lamb/mutton? (Do not count processed meats)               | Less than once a week<br>Once a week                                                              |                                                                                                                                          |
|                        | How often do you eat pork? (Do not count processed meats such as bacon or ham) | 2-4 times a week<br>5-6 times a week<br>Once or more daily<br>Do not know<br>Prefer not to answer |                                                                                                                                          |
| Breastfed as a baby    | Were you breastfed when you were a baby?                                       | SELECT one:<br>Yes<br>No<br>Do not know<br>Prefer not to answer                                   |                                                                                                                                          |

Source: <https://biobank.ndph.ox.ac.uk/showcase/showcase/docs/TouchscreenQuestionsMainFinal.pdf>

**Supplemental Table 2. Characteristics of the analysis sample by age groups**

| Characteristics*                                | Age Group      |                  |
|-------------------------------------------------|----------------|------------------|
|                                                 | Age <55        | Age ≥ 55         |
| <b>Number of persons</b>                        | <b>13,309</b>  | <b>2,4679</b>    |
| Age, yr, mean(sd)                               | 47.64 (4.16)   | 62.60 (4.08) )   |
| Female                                          | 7,646 (57.45)  | 12,380 (50.16) ) |
| Townsend-deprivation index, mean(sd)            | -0.82*(3.26)   | -1.42 (3.01)     |
| White/British                                   | 12,074 (90.72) | 23,719 (96.11)   |
| Household Income, £< 18,000                     | 1,817 (13.65)  | 6,447 (26.12)    |
| College or university degree                    | 4,551 (34.19)  | 6,449 (26.13)    |
| Currently employed                              | 11,353 (85.30) | 9,001 (36.47)    |
| Homeowner                                       | 11,842 (88.98) | 22,453 (90.98)   |
| Number of co-habitants ≥ 4                      | 5,176 (38.89)  | 1,645 (6.67)     |
| Current smoker                                  | 1,926 (14.47)  | 2,279 (9.23)     |
| BMI (kg/m <sup>2</sup> ), mean(sd)              | 27.70* (5.21)  | 28.05 (4.79)     |
| Physical activity, minutes/day, mean(sd)        | 75.76 (100.10) | 75.36 (96.10)    |
| Breastfed as baby                               | 6,998 (52.58)  | 14,053 (56.94)   |
| Poor overall health rating                      | 881 (6.62)     | 1,531 (6.20)     |
| Using cholesterol medication                    | 1,051 (7.90)   | 7,144 (28.95)    |
| Using blood pressure medication                 | 1,470 (11.05)  | 8,140 (32.98)    |
| Diabetes                                        | 524 (3.94)     | 2,156 (8.74)     |
| Heart diseases                                  | 363 (2.73)     | 2,640 (10.70)    |
| Coffee consumption, cups/day, mean(sd)          | 2.04 (2.19)    | 2.01(1.98)       |
| Tea consumption, cups/day, mean(sd)             | 3.28* (2.81)   | 3.51 (2.69)      |
| Fruit (fresh/dried), servings/day, mean(sd)     | 2.68* (2.44)   | 3.24 (2.67)      |
| Vegetables (cooked/raw), servings/day, mean(sd) | 0.79* (0.56)   | 0.84 (0.54)      |
| Oily fish consumption, servings/day, mean(sd)   | 0.14* (0.14)   | 0.17 (0.16)      |
| Processed meat, servings/day, mean(sd)          | 0.22* (0.21)   | 0.21 (0.20)      |
| Red meat, servings/day, mean(sd)                | 0.29* (0.21)   | 0.31 (0.21)      |
| Pre-existing compromised pulmonary function     | 6,581 (49.45)  | 13,549 (54.90)   |
| COVID-19 exposed rate**, mean(sd)               | 3.33 (1.49)    | 3.22 (1.49)      |
| COVID_19 positive                               | 3,439 (25.84)  | 3,043 (12.33)    |

\*Data drawn from baseline (2006-10) except for pre-existing compromised pulmonary function, the COVID-19 exposed rate, and COVID\_19 test results. Values are numbers (%) unless stated otherwise. All characteristic values are significantly different across age groups ( $P < 0.05$ ), except for physical activity and coffee consumption.

\*\*Average monthly rates (per 1000) of positive cases per specific geo-populations between March and November 2021.

**Supplemental Table 3. Characteristics of the analysis sample by racial groups**

| <b>Characteristics*</b>                         | <b>White</b>   | <b>Asian</b>  | <b>Black</b>   | <b>Mixed/Others</b> |
|-------------------------------------------------|----------------|---------------|----------------|---------------------|
| <b>Number of persons</b>                        | <b>35793</b>   | <b>899</b>    | <b>638</b>     | <b>658</b>          |
| Age, yr, mean(sd)                               | 57.59 (8.17)   | 54.06 (8.46)  | 53.07 (8.16)   | 53.24 (8.19)        |
| Female                                          | 18,830 (52.61) | 413 (45.94)   | 393 (61.60)    | 390 (59.27)         |
| Townsend-deprivation index, mean(sd)            | -1.35 (3.03)   | 0.31 (3.23)   | 2.65 (3.44)    | 0.74 (3.73)         |
| Household Income, £< 18,000                     | 7,710 (21.54)  | 214 (23.80)   | 178 (27.90)    | 162 (24.62)         |
| College or university degree                    | 10,168 (28.41) | 343 (38.15)   | 213 (33.39)    | 276 (41.95)         |
| Currently employed                              | 18,969 (53.00) | 545 (60.62)   | 422 (66.14)    | 418 (63.53)         |
| Homeowner                                       | 32,608 (91.10) | 788 (87.65)   | 407 (63.79)    | 492 (74.77)         |
| Number of co-habitants $\geq 4$                 | 5,986 (16.72)  | 462 (51.39)   | 180 (28.21)    | 193 (29.33)         |
| Current smoker                                  | 3,922 (10.96)  | 102 (11.35)   | 77 (12.07)     | 104 (15.81)         |
| BMI (kg/m <sup>2</sup> ), mean(sd)              | 27.90 (4.93)   | 27.24 (4.62)  | 29.80 (5.39)   | 28.34 (5.35)        |
| Physical activity, minutes/day, mean(sd)        | 76.20 (97.57)  | 54.79 (79.21) | 74.70 (114.39) | 66.80 (96.07)       |
| Poor overall health rating                      | 2,203 (6.15)   | 95 (10.57)    | 52 (8.15)      | 62 (9.42)           |
| Using cholesterol medication                    | 7,678 (21.45)  | 249 (27.70)   | 139 (21.79)    | 129 (19.60)         |
| Using blood pressure medication                 | 8,928 (24.94)  | 272 (30.26)   | 241 (37.77)    | 169 (25.68)         |
| Diabetes                                        | 2,324 (6.49)   | 181 (20.13)   | 94 (14.73)     | 81 (12.31)          |
| Heart diseases                                  | 2,830 (7.91)   | 94 (10.46)    | 45 (7.05)      | 34 (5.17)           |
| Breastfed as baby                               | 19,388 (54.17) | 713 (79.31)   | 526 (82.45)    | 424 (64.44)         |
| Coffee consumption, cups/day, mean(sd)          | 2.07 (2.07)    | 0.86 (1.28)   | 1.05 (1.49)    | 1.64 (1.79)         |
| Tea consumption, cups/day, mean(sd)             | 3.47 (2.76)    | 2.86 (1.95)   | 2.50 (2.12)    | 2.88 (2.57)         |
| Fruit (fresh/dried), servings/day, mean(sd)     | 3.00 (2.51)    | 3.97 (3.96)   | 3.74 (4.05)    | 3.58 (3.10)         |
| Vegetables (cooked/raw), servings/day, mean(sd) | 0.82 (0.53)    | 1.04 (0.82)   | 0.88 (0.64)    | 0.97 (0.71)         |
| Oily fish consumption, servings/day, mean(sd)   | 0.16 (0.15)    | 0.12 (0.14)   | 0.22 (0.21)    | 0.18 (0.17)         |
| Processed meat, servings/day, mean(sd)          | 0.22 (0.20)    | 0.16 (0.20)   | 0.17 (0.20)    | 0.16 (0.19)         |
| Red meat, servings/day, mean(sd)                | 0.30 (0.20)    | 0.23 (0.24)   | 0.35 (0.28)    | 0.32 (0.25)         |
| Pre-existing compromised pulmonary function     | 18,970 (53.00) | 519 (57.73)   | 309 (48.43)    | 332 (50.46)         |
| COVID-19 exposed rate**                         | 3.28 (1.48)    | 2.90 (1.47)   | 2.72 (1.55)    | 2.90 (1.59)         |
| COVID_19 positive                               | 6,011 (16.79)  | 223 (24.81)   | 123 (19.28)    | 125 (19.00)         |

\*Data drawn from baseline (2006-10) except for pre-existing compromised pulmonary function, COVID-19 exposed rate, and COVID\_19 test results. Values are numbers (%) unless stated otherwise. All characteristic values are significantly different across racial groups (P<0.001).

\*\*Average monthly rates (per 1000) of positive cases per specific geo-populations between March and November 2021.

**Supplemental Table 4: Age-race-sex adjusted OR (95% CI) of having positive COVID-19 test by nutritional factors**

| Nutritional factor*                          | Crude Model       |        |
|----------------------------------------------|-------------------|--------|
|                                              | OR (95%CI)        | p      |
| <b>Coffee, cups/day</b>                      |                   |        |
| None or <1 cup                               | Reference         |        |
| 1 cup                                        | 0.86 (0.79, 0.93) | <0.001 |
| 2-3 cups                                     | 0.85 (0.79, 0.91) | <0.001 |
| ≥ 4 cups                                     | 0.92 (0.90, 0.97) | 0.007  |
| <b>Tea, cups/day</b>                         |                   |        |
| None or <1 cup                               | Reference         |        |
| 1 cup                                        | 0.89 (0.79, 0.99) | 0.042  |
| 2-3 cups                                     | 0.93 (0.85, 1.00) | 0.060  |
| ≥ 4 cups                                     | 1.02 (0.94, 1.10) | 0.6871 |
| <b>Oily fish, servings/day</b>               |                   |        |
| Quartile 1 (0-<0.07)                         | Reference         |        |
| Quartile 2 (0.07- <0.14)                     | 0.87 (0.80, 0.95) | 0.002  |
| Quartiles 3 and 4 (≥0.14)                    | 0.86 (0.79, 0.93) | <0.001 |
| <b>Processed meat, servings/day</b>          |                   |        |
| Quartile 1 (0-<0.07)                         | Reference         |        |
| Quartile 2 (0.07- <0.14)                     | 1.08 (0.96, 1.20) | 0.190  |
| Quartile 3 (0.14- <0.43)                     | 1.17 (1.05, 1.31) | 0.005  |
| Quartile 4 (≥0.43)                           | 1.25 (1.12, 1.40) | <0.001 |
| <b>Red meat, servings/day</b>                |                   |        |
| Quartile 1 (0- <0.21)                        | Reference         |        |
| Quartile 2 (0.21- <0.28)                     | 0.96 (0.88, 1.04) | 0.280  |
| Quartile 3 (0.28- <0.35)                     | 1.03 (0.94, 1.12) | 0.571  |
| Quartile 4 (≥0.35)                           | 1.00 (0.92, 1.08) | 0.896  |
| <b>Fruit (fresh/dried), servings/day</b>     |                   |        |
| Quartile 1 (0- <1.00)                        | Reference         |        |
| Quartile 2 (1.00- <2.25)                     | 1.02 (0.92, 1.12) | 0.766  |
| Quartile 3 (2.25- <4.00)                     | 0.92 (0.83, 1.03) | 0.155  |
| Quartile 4 (≥4.00)                           | 0.93 (0.84, 1.03) | 0.166  |
| <b>Vegetables (cooked/raw), servings/day</b> |                   |        |
| Quartile 1 (0- <0.50)                        | Reference         |        |
| Quartile 2 (0.50- <0.67)                     | 0.89 (0.82, 0.96) | 0.003  |
| Quartile 3 (0.67- <1.00)                     | 0.85 (0.77, 0.94) | 0.001  |
| Quartile 4 (≥1.00)                           | 0.90 (0.83, 0.97) | 0.008  |
| <b>Breastfed as a baby</b>                   |                   |        |
| No                                           | Reference         |        |
| Yes                                          | 0.87 (0.81, 0.93) | <0.001 |
| Don't know                                   | 0.99 (0.81, 1.07) | 0.735  |

\* Individual diet factors assessed in separate models.

**Supplemental Table 5: Adjusted\* OR (95% CI) of having positive COVID-19 test by nutritional factors, stratified by Wave**

| Nutritional Factor                           | Wave 1           |       | Wave 2           |       |
|----------------------------------------------|------------------|-------|------------------|-------|
|                                              | OR (95% CI)      | p     | OR (95% CI)      | p     |
| <b>Coffee, cups/day</b>                      |                  |       |                  |       |
| None or <1 cup                               | Reference        |       | Reference        |       |
| 1 cup                                        | 0.89(0.76, 1.04) | 0.150 | 0.92(0.83, 1.01) | 0.064 |
| 2-3 cups                                     | 0.92(0.79, 1.06) | 0.247 | 0.88(0.81, 0.96) | 0.005 |
| ≥ 4 cups                                     | 1.01(0.86, 1.20) | 0.888 | 0.90(0.81, 0.99) | 0.035 |
| <b>Tea, cups/day</b>                         |                  |       |                  |       |
| None or <1 cup                               | Reference        |       | Reference        |       |
| 1 cup                                        | 0.88(0.70, 1.11) | 0.287 | 0.97(0.85, 1.12) | 0.693 |
| 2-3 cups                                     | 0.95(0.80, 1.12) | 0.529 | 0.92(0.84, 1.02) | 0.126 |
| ≥ 4 cups                                     | 1.03(0.87, 1.21) | 0.749 | 0.96(0.87, 1.06) | 0.439 |
| <b>Oily fish, servings/day</b>               |                  |       |                  |       |
| Quartile 1 (0-<0.07)                         | Reference        |       | Reference        |       |
| Quartile 2 (0.07- <0.14)                     | 0.91(0.76, 1.09) | 0.296 | 0.94(0.85, 1.05) | 0.299 |
| Quartiles 3 and 4 (≥0.14)                    | 0.96(0.81, 1.15) | 0.668 | 0.99(0.89, 1.10) | 0.782 |
| <b>Processed meat, servings/day</b>          |                  |       |                  |       |
| Quartile 1 (0-<0.07)                         | Reference        |       | Reference        |       |
| Quartile 2 (0.07- <0.14)                     | 0.94(0.75, 1.18) | 0.573 | 1.06(0.92, 1.23) | 0.390 |
| Quartile 3 (0.14- <0.43)                     | 1.03(0.81, 1.30) | 0.832 | 1.08(0.94, 1.25) | 0.280 |
| Quartile 4 (≥0.43)                           | 1.04(0.83, 1.32) | 0.719 | 1.13(0.98, 1.31) | 0.102 |
| <b>Red meat, servings/day</b>                |                  |       |                  |       |
| Quartile 1 (0- <0.21)                        | Reference        |       | Reference        |       |
| Quartile 2 (0.21- <0.28)                     | 0.96(0.80, 1.14) | 0.636 | 0.95(0.86, 1.05) | 0.335 |
| Quartile 3 (0.28- <0.35)                     | 1.01(0.83, 1.22) | 0.935 | 1.00(0.89, 1.12) | 0.938 |
| Quartile 4 (≥0.35)                           | 0.97(0.81, 1.15) | 0.721 | 0.99(0.89, 1.10) | 0.839 |
| <b>Fruit (fresh/dried), servings/day</b>     |                  |       |                  |       |
| Quartile 1 (0- <1.00)                        | Reference        |       | Reference        |       |
| Quartile 2 (1.00- <2.25)                     | 0.94(0.77, 1.14) | 0.522 | 1.07(0.95, 1.21) | 0.270 |
| Quartile 3 (2.25- <4.00)                     | 1.06(0.85, 1.32) | 0.607 | 0.99(0.87, 1.13) | 0.884 |
| Quartile 4 (≥4.00)                           | 1.05(0.85, 1.30) | 0.672 | 1.01(0.89, 1.15) | 0.871 |
| <b>Vegetables (cooked/raw), servings/day</b> |                  |       |                  |       |
| Quartile 1 (0- <0.50)                        | Reference        |       | Reference        |       |
| Quartile 2 (0.50- <0.67)                     | 0.85(0.72, 1.00) | 0.044 | 0.96(0.87, 1.05) | 0.347 |
| Quartile 3 (0.67- <1.00)                     | 0.86(0.70, 1.04) | 0.122 | 0.91(0.81, 1.02) | 0.105 |
| Quartile 4 (≥1.00)                           | 0.94(0.79, 1.10) | 0.424 | 0.91(0.83, 1.01) | 0.079 |
| <b>Breastfed as a baby</b>                   |                  |       |                  |       |
| No                                           | Reference        |       | Reference        |       |
| Yes                                          | 0.91(0.79, 1.05) | 0.182 | 0.93(0.85, 1.01) | 0.071 |
| Don't know                                   | 0.93(0.79, 1.10) | 0.374 | 1.02(0.92, 1.12) | 0.751 |

\*Adjusted for Townsend deprivation index, baseline age, sex, race, education, income, employment status, home ownership, number of co-habitants, BMI level, smoking status, physical activity, self-rated

health, cholesterol-lowering medication use, antihypertension medication use, history of diabetes, and history of cardiovascular disease, with all diet factors included in the model.

**Supplemental Table 6: Adjusted\* OR (95% CI) of having positive COVID-19 test by nutritional factors, stratified by baseline age group**

| Nutritional factor                           | Baseline Age <55  |       | Baseline Age ≥ 55 |       |
|----------------------------------------------|-------------------|-------|-------------------|-------|
|                                              | OR (95%CI)        | p     | OR (95%CI)        | p     |
| <b>Coffee, cups/day</b>                      |                   |       |                   |       |
| None or <1 cup                               | Reference         |       | Reference         |       |
| 1 cup                                        | 0.88 (0.78, 0.98) | 0.026 | 0.94 (0.84, 1.06) | 0.316 |
| 2-3 cups                                     | 0.85 (0.77, 0.95) | 0.004 | 0.95 (0.86, 1.06) | 0.340 |
| ≥ 4 cups                                     | 0.88 (0.78, 0.99) | 0.040 | 0.97 (0.85, 1.09) | 0.574 |
| <b>Tea, cups/day</b>                         |                   |       |                   |       |
| None or <1 cup                               | Reference         |       | Reference         |       |
| 1 cup                                        | 0.87 (0.74, 1.03) | 0.107 | 0.99 (0.83, 1.17) | 0.877 |
| 2-3 cups                                     | 0.96 (0.85, 1.08) | 0.515 | 0.88 (0.78, 0.99) | 0.040 |
| ≥ 4 cups                                     | 1.01 (0.90, 1.14) | 0.846 | 0.94 (0.83, 1.05) | 0.279 |
| <b>Oily fish, servings/day</b>               |                   |       |                   |       |
| Quartile 1 (0-<0.07)                         | Reference         |       | Reference         |       |
| Quartile 2 (0.07- <0.14)                     | 0.93 (0.82, 1.05) | 0.237 | 0.95 (0.82, 1.09) | 0.469 |
| Quartiles 3 and 4 (≥0.14)                    | 0.98 (0.87, 1.11) | 0.762 | 0.99 (0.86, 1.13) | 0.837 |
| <b>Processed meat, servings/day</b>          |                   |       |                   |       |
| Quartile 1 (0-<0.07)                         | Reference         |       | Reference         |       |
| Quartile 2 (0.07- <0.14)                     | 1.13 (0.95, 1.34) | 0.177 | 1.00 (0.85, 1.19) | 0.970 |
| Quartile 3 (0.14- <0.43)                     | 1.13 (0.95, 1.35) | 0.172 | 1.07 (0.90, 1.27) | 0.424 |
| Quartile 4 (≥0.43)                           | 1.26 (1.05, 1.50) | 0.012 | 1.06 (0.89, 1.26) | 0.513 |
| <b>Red meat, servings/day</b>                |                   |       |                   |       |
| Quartile 1 (0- <0.21)                        | Reference         |       | Reference         |       |
| Quartile 2 (0.21- <0.28)                     | 0.99 (0.87, 1.12) | 0.855 | 0.92 (0.81, 1.04) | 0.191 |
| Quartile 3 (0.28- <0.35)                     | 1.01 (0.88, 1.16) | 0.853 | 0.99 (0.86, 1.14) | 0.860 |
| Quartile 4 (≥0.35)                           | 0.94 (0.83, 1.07) | 0.326 | 1.02 (0.90, 1.16) | 0.794 |
| <b>Fruit (fresh/dried), servings/day</b>     |                   |       |                   |       |
| Quartile 1 (0- <1.00)                        | Reference         |       | Reference         |       |
| Quartile 2 (1.00- <2.25)                     | 1.04 (0.90, 1.19) | 0.609 | 1.05 (0.90, 1.22) | 0.543 |
| Quartile 3 (2.25- <4.00)                     | 0.98 (0.83, 1.15) | 0.772 | 1.06 (0.90, 1.25) | 0.503 |
| Quartile 4 (≥4.00)                           | 1.03 (0.88, 1.20) | 0.751 | 1.03 (0.88, 1.21) | 0.712 |
| <b>Vegetables (cooked/raw), servings/day</b> |                   |       |                   |       |
| Quartile 1 (0- <0.50)                        | Reference         |       | Reference         |       |
| Quartile 2 (0.50- <0.67)                     | 0.90 (0.81, 1.01) | 0.074 | 0.94 (0.84, 1.06) | 0.313 |
| Quartile 3 (0.67- <1.00)                     | 0.88 (0.77, 1.02) | 0.096 | 0.88 (0.76, 1.01) | 0.073 |
| Quartile 4 (≥1.00)                           | 0.99 (0.88, 1.12) | 0.877 | 0.86 (0.76, 0.98) | 0.020 |
| <b>Breastfed as a baby</b>                   |                   |       |                   |       |
| No                                           | Reference         |       | Reference         |       |
| Yes                                          | 0.95 (0.84, 1.08) | 0.425 | 1.02 (0.90, 1.16) | 0.717 |
| Don't know                                   | 0.91 (0.83, 1.00) | 0.052 | 0.94 (0.84, 1.05) | 0.294 |



\* Adjusted for Townsend deprivation index, baseline age, sex, race, education, income, employment status, home ownership, number of co-habitants, BMI level, smoking status, physical activity, self-rated health, cholesterol-lowering medication use, antihypertension medication use, history of diabetes, and history of cardiovascular disease, with all diet factors included in the model (i.e. mutual adjustment).

**Supplemental Table 7: Adjusted\* OR (95% CI) of having positive COVID-19 test by nutritional factors, stratified by sex**

| Nutritional factor                           | Female            |       | Male              |       |
|----------------------------------------------|-------------------|-------|-------------------|-------|
|                                              | OR (95%CI)        | p     | OR (95%CI)        | p     |
| <b>Coffee, cups/day</b>                      |                   |       |                   |       |
| None or <1 cup                               | Reference         |       | Reference         |       |
| 1 cup                                        | 0.90 (0.81, 1.01) | 0.073 | 0.90 (0.80, 1.01) | 0.080 |
| 2-3 cups                                     | 0.91 (0.82, 1.00) | 0.060 | 0.88 (0.79, 0.98) | 0.016 |
| ≥ 4 cups                                     | 0.92 (0.81, 1.03) | 0.155 | 0.91 (0.81, 1.03) | 0.136 |
| <b>Tea, cups/day</b>                         |                   |       |                   |       |
| None or <1 cup                               | Reference         |       | Reference         |       |
| 1 cup                                        | 0.90 (0.76, 1.06) | 0.207 | 0.96 (0.81, 1.13) | 0.598 |
| 2-3 cups                                     | 0.90 (0.80, 1.02) | 0.096 | 0.95 (0.84, 1.08) | 0.459 |
| ≥ 4 cups                                     | 0.96 (0.85, 1.07) | 0.444 | 1.00 (0.88, 1.12) | 0.945 |
| <b>Oily fish, servings/day</b>               |                   |       |                   |       |
| Quartile 1 (0-<0.07)                         | Reference         |       | Reference         |       |
| Quartile 2 (0.07- <0.14)                     | 0.99 (0.86, 1.13) | 0.824 | 0.90 (0.79, 1.03) | 0.131 |
| Quartiles 3 and 4 (≥0.14)                    | 1.04 (0.91, 1.18) | 0.603 | 0.94 (0.82, 1.06) | 0.313 |
| <b>Processed meat, servings/day</b>          |                   |       |                   |       |
| Quartile 1 (0-<0.07)                         | Reference         |       | Reference         |       |
| Quartile 2 (0.07- <0.14)                     | 1.06 (0.92, 1.23) | 0.415 | 1.01 (0.81, 1.24) | 0.965 |
| Quartile 3 (0.14- <0.43)                     | 1.09 (0.94, 1.28) | 0.250 | 1.07 (0.87, 1.32) | 0.538 |
| Quartile 4 (≥0.43)                           | 1.16 (0.99, 1.36) | 0.066 | 1.11 (0.90, 1.36) | 0.343 |
| <b>Red meat, servings/day</b>                |                   |       |                   |       |
| Quartile 1 (0- <0.21)                        | Reference         |       | Reference         |       |
| Quartile 2 (0.21- <0.28)                     | 1.04 (0.92, 1.17) | 0.542 | 0.83 (0.73, 0.95) | 0.008 |
| Quartile 3 (0.28- <0.35)                     | 1.07 (0.93, 1.22) | 0.353 | 0.89 (0.77, 1.03) | 0.126 |
| Quartile 4 (≥0.35)                           | 1.08 (0.96, 1.22) | 0.196 | 0.84 (0.74, 0.97) | 0.013 |
| <b>Fruit (fresh/dried), servings/day</b>     |                   |       |                   |       |
| Quartile 1 (0- <1.00)                        | Reference         |       | Reference         |       |
| Quartile 2 (1.00- <2.25)                     | 0.95 (0.81, 1.11) | 0.506 | 1.12 (0.98, 1.28) | 0.092 |
| Quartile 3 (2.25- <4.00)                     | 0.88 (0.74, 1.05) | 0.160 | 1.14 (0.98, 1.33) | 0.097 |
| Quartile 4 (≥4.00)                           | 0.88 (0.75, 1.05) | 0.148 | 1.15 (0.99, 1.34) | 0.072 |
| <b>Vegetables (cooked/raw), servings/day</b> |                   |       |                   |       |
| Quartile 1 (0- <0.50)                        | Reference         |       | Reference         |       |
| Quartile 2 (0.50- <0.67)                     | 0.89 (0.79, 1.01) | 0.061 | 0.97 (0.87, 1.08) | 0.524 |
| Quartile 3 (0.67- <1.00)                     | 0.87 (0.76, 1.01) | 0.067 | 0.89 (0.78, 1.03) | 0.119 |
| Quartile 4 (≥1.00)                           | 0.96 (0.84, 1.08) | 0.486 | 0.87 (0.77, 0.98) | 0.018 |
| <b>Breastfed as a baby</b>                   |                   |       |                   |       |
| No                                           | Reference         |       | Reference         |       |
| Yes                                          | 0.95 (0.85, 1.07) | 0.425 | 1.02 (0.90, 1.15) | 0.737 |
| Don't know                                   | 0.89 (0.82, 0.98) | 0.018 | 0.94 (0.84, 1.05) | 0.281 |

\* Adjusted for Townsend deprivation index, baseline age, race, education, income, employment status, home ownership, number of co-habitants, BMI level, smoking status, physical activity, self-rated health, cholesterol-lowering medication use, antihypertension medication use, history of diabetes, and history of cardiovascular disease, with all diet factors included in the model (i.e. mutual adjustment).

**Supplemental Table 8: Adjusted\* OR (95% CI) of having positive COVID-19 test by nutritional factors, stratified by racial group**

| Nutritional factor**                     | White             |       | Asian             |       | Black             |       | Mixed/Others      |       |
|------------------------------------------|-------------------|-------|-------------------|-------|-------------------|-------|-------------------|-------|
|                                          | OR (95%CI)        | p     |
| <b>Coffee, cups/day</b>                  |                   |       |                   |       |                   |       |                   |       |
| None or <1cup                            | Reference         |       | Reference         |       | Reference         |       | Reference         |       |
| 1 cup                                    | 0.91 (0.84, 0.99) | 0.034 | 1.04 (0.68, 1.59) | 0.865 | 0.45 (0.25, 0.82) | 0.009 | 0.88 (0.49, 1.59) | 0.669 |
| 2-3 cups                                 | 0.91 (0.84, 0.98) | 0.017 | 0.85 (0.50, 1.43) | 0.535 | 0.44 (0.22, 0.90) | 0.024 | 0.56 (0.30, 1.03) | 0.061 |
| ≥ 4 cups                                 | 0.92 (0.84, 1.00) | 0.060 | 1.88 (0.81, 4.37) | 0.141 | 0.59 (0.24, 1.49) | 0.268 | 0.58 (0.27, 1.22) | 0.149 |
| <b>Tea, cups/day</b>                     |                   |       |                   |       |                   |       |                   |       |
| None or <1cup                            | Reference         |       | Reference         |       | Reference         |       | Reference         |       |
| 1 cup                                    | 0.91 (0.80, 1.03) | 0.126 | 2.21 (0.99, 4.94) | 0.054 | 1.19 (0.52, 2.70) | 0.686 | 0.88 (0.38, 2.03) | 0.771 |
| 2-3 cups                                 | 0.91 (0.83, 1.00) | 0.042 | 1.93 (0.94, 3.97) | 0.073 | 1.05 (0.53, 2.07) | 0.886 | 0.73 (0.36, 1.46) | 0.372 |
| ≥ 4 cups                                 | 0.95 (0.88, 1.04) | 0.272 | 1.90 (0.91, 3.96) | 0.087 | 1.39 (0.69, 2.81) | 0.361 | 1.21 (0.62, 2.35) | 0.573 |
| <b>Oily fish, servings/day</b>           |                   |       |                   |       |                   |       |                   |       |
| Quartile 1                               | Reference         |       | Reference         |       | Reference         |       | Reference         |       |
| Quartile 2                               | 0.93 (0.84, 1.02) | 0.130 | 0.97 (0.56, 1.69) | 0.922 | 0.86 (0.34, 2.17) | 0.744 | 1.33 (0.56, 3.16) | 0.522 |
| Quartiles 3 and 4                        | 0.97 (0.88, 1.06) | 0.506 | 1.13 (0.67, 1.90) | 0.657 | 0.91 (0.37, 2.21) | 0.831 | 1.34 (0.58, 3.07) | 0.491 |
| <b>Processed meat, servings/day</b>      |                   |       |                   |       |                   |       |                   |       |
| Quartile 1                               | Reference         |       | Reference         |       | Reference         |       | Reference         |       |
| Quartile 2                               | 1.08 (0.95, 1.23) | 0.237 | 0.76 (0.43, 1.34) | 0.338 | 0.43 (0.20, 0.95) | 0.036 | 1.14 (0.54, 2.43) | 0.726 |
| Quartile 3                               | 1.13 (0.99, 1.29) | 0.081 | 0.82 (0.45, 1.49) | 0.506 | 0.47 (0.21, 1.07) | 0.072 | 0.88 (0.38, 2.06) | 0.768 |
| Quartile 4                               | 1.16 (1.02, 1.33) | 0.028 | 0.70 (0.38, 1.29) | 0.251 | 1.01 (0.43, 2.37) | 0.975 | 1.23 (0.54, 2.80) | 0.631 |
| <b>Red meat, servings/day</b>            |                   |       |                   |       |                   |       |                   |       |
| Quartile 1                               | Reference         |       | Reference         |       | Reference         |       | Reference         |       |
| Quartile 2                               | 0.95 (0.87, 1.04) | 0.282 | 1.38 (0.64, 2.96) | 0.412 | 0.97 (0.41, 2.29) | 0.938 | 1.62 (0.76, 3.43) | 0.209 |
| Quartile 3                               | 0.98 (0.88, 1.08) | 0.682 | 1.45 (0.74, 2.83) | 0.281 | 1.48 (0.58, 3.76) | 0.413 | 1.75 (0.80, 3.81) | 0.160 |
| Quartile 4                               | 0.98 (0.89, 1.07) | 0.625 | 1.27 (0.63, 2.54) | 0.506 | 1.36 (0.53, 3.47) | 0.518 | 1.62 (0.79, 3.32) | 0.192 |
| <b>Fruit (fresh/dried), servings/day</b> |                   |       |                   |       |                   |       |                   |       |
| Quartile 1                               | Reference         |       | Reference         |       | Reference         |       | Reference         |       |
| Quartile 2                               | 1.04 (0.93, 1.15) | 0.498 | 1.68 (0.76, 3.73) | 0.199 | 1.17 (0.44, 3.13) | 0.751 | 0.61 (0.26, 1.42) | 0.253 |
| Quartile 3                               | 1.02 (0.90, 1.15) | 0.770 | 1.26 (0.53, 2.99) | 0.595 | 1.36 (0.47, 3.92) | 0.569 | 0.52 (0.21, 1.32) | 0.170 |

|                                              |                   |       |                   |       |                   |       |                   |       |
|----------------------------------------------|-------------------|-------|-------------------|-------|-------------------|-------|-------------------|-------|
| Quartile 4                                   | 1.01 (0.90, 1.13) | 0.899 | 1.97 (0.88, 4.43) | 0.101 | 1.00 (0.36, 2.77) | 0.996 | 0.65 (0.27, 1.55) | 0.330 |
| <b>Vegetables (cooked/raw), servings/day</b> |                   |       |                   |       |                   |       |                   |       |
| Quartile 1                                   | Reference         |       | Reference         |       | Reference         |       | Reference         |       |
| Quartile 2                                   | 0.90 (0.83, 0.98) | 0.011 | 2.04 (1.15, 3.61) | 0.015 | 1.25 (0.65, 2.43) | 0.502 | 1.40 (0.66, 2.94) | 0.378 |
| Quartile 3                                   | 0.85 (0.77, 0.94) | 0.002 | 1.76 (0.99, 3.13) | 0.055 | 1.55 (0.78, 3.08) | 0.214 | 1.85 (0.91, 3.75) | 0.087 |
| Quartile 4                                   | 0.89 (0.82, 0.97) | 0.011 | 1.71 (0.95, 3.09) | 0.075 | 1.10 (0.51, 2.35) | 0.816 | 1.28 (0.57, 2.87) | 0.552 |
| <b>Breastfed as a baby</b>                   |                   |       |                   |       |                   |       |                   |       |
| No                                           | Reference         |       | Reference         |       | Reference         |       | Reference         |       |
| Yes                                          | 0.98 (0.90, 1.07) | 0.618 | 1.71 (0.69, 4.24) | 0.247 | 1.02 (0.34, 3.10) | 0.975 | 1.17 (0.54, 2.51) | 0.690 |
| Don't know                                   | 0.91 (0.85, 0.98) | 0.010 | 2.14 (0.96, 4.78) | 0.064 | 0.45 (0.17, 1.21) | 0.112 | 0.78 (0.41, 1.52) | 0.468 |

\* Adjusted for Townsend deprivation index, baseline age, race, education, income, employment status, home ownership, number of co-habitants, BMI level, smoking status, physical activity, self-rated health, cholesterol-lowering medication use, antihypertension medication use, history of diabetes, and history of cardiovascular disease, with all diet factors included in the model (i.e. mutual adjustment).

\*\*Race-specific cut-points were used to determine quartiles.

**Supplemental Figure 1. Flow chart depicting the study design and the analysis sample**

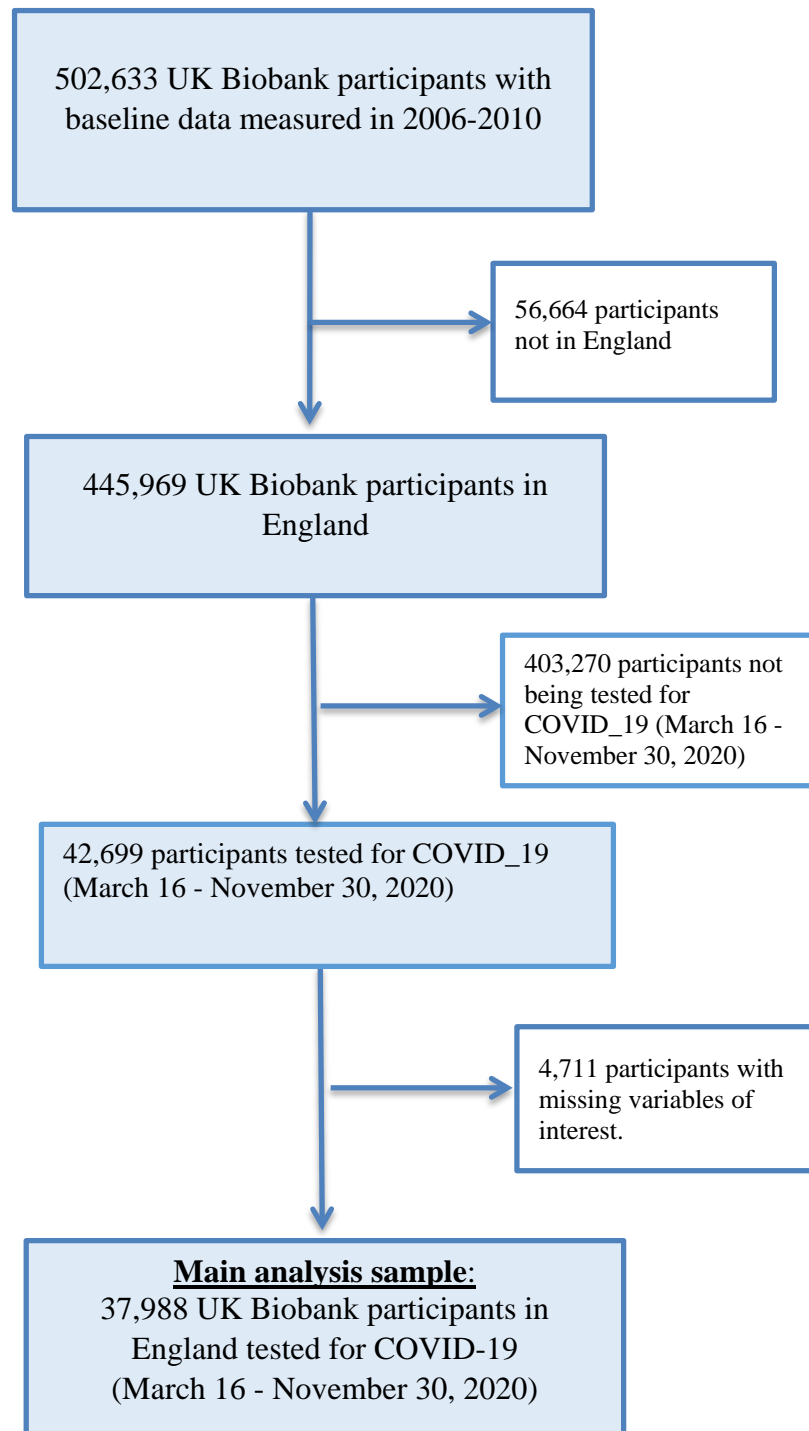

**Supplemental Figure 2: National (UK) COVID-19 Cases Reported Between March and December 1 2020**

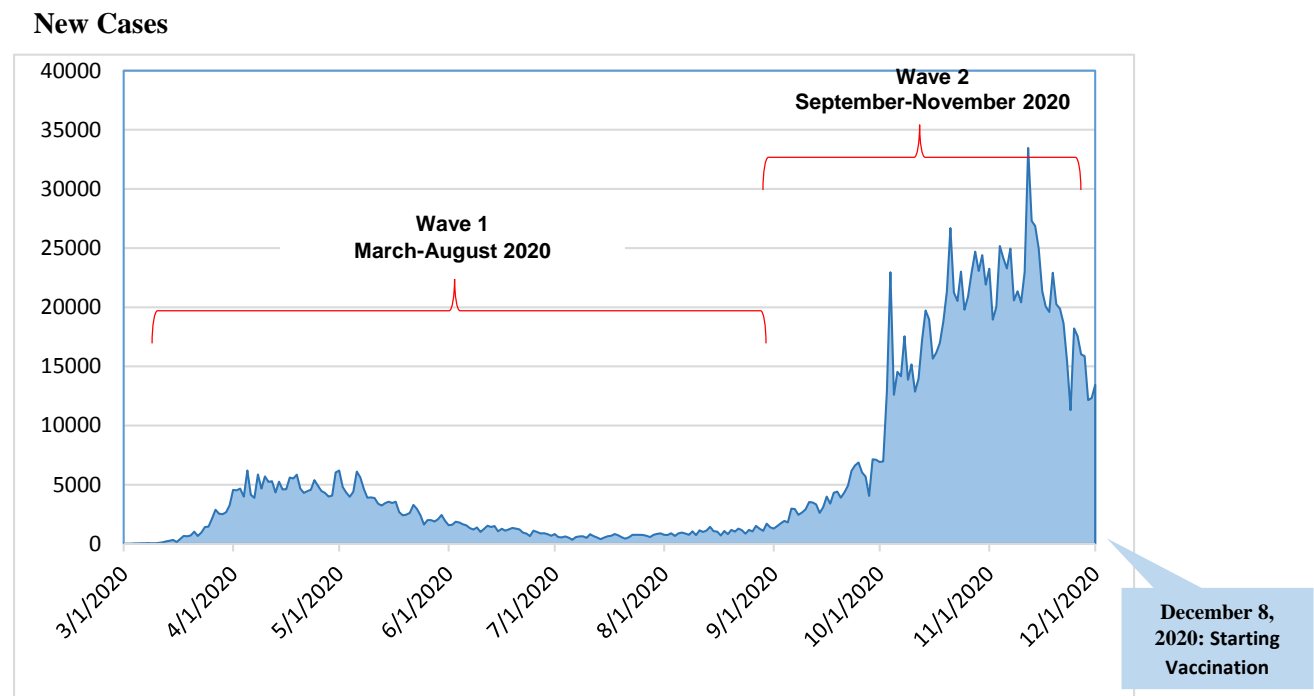

Source: Cases by date reported <https://coronavirus.data.gov.uk/details/cases>. Accessed June 1, 2021

**Supplemental Figure 3. Total COVID-19 Positive Tests in UKB (A) Compared to National Data by Wave (B and C)\***

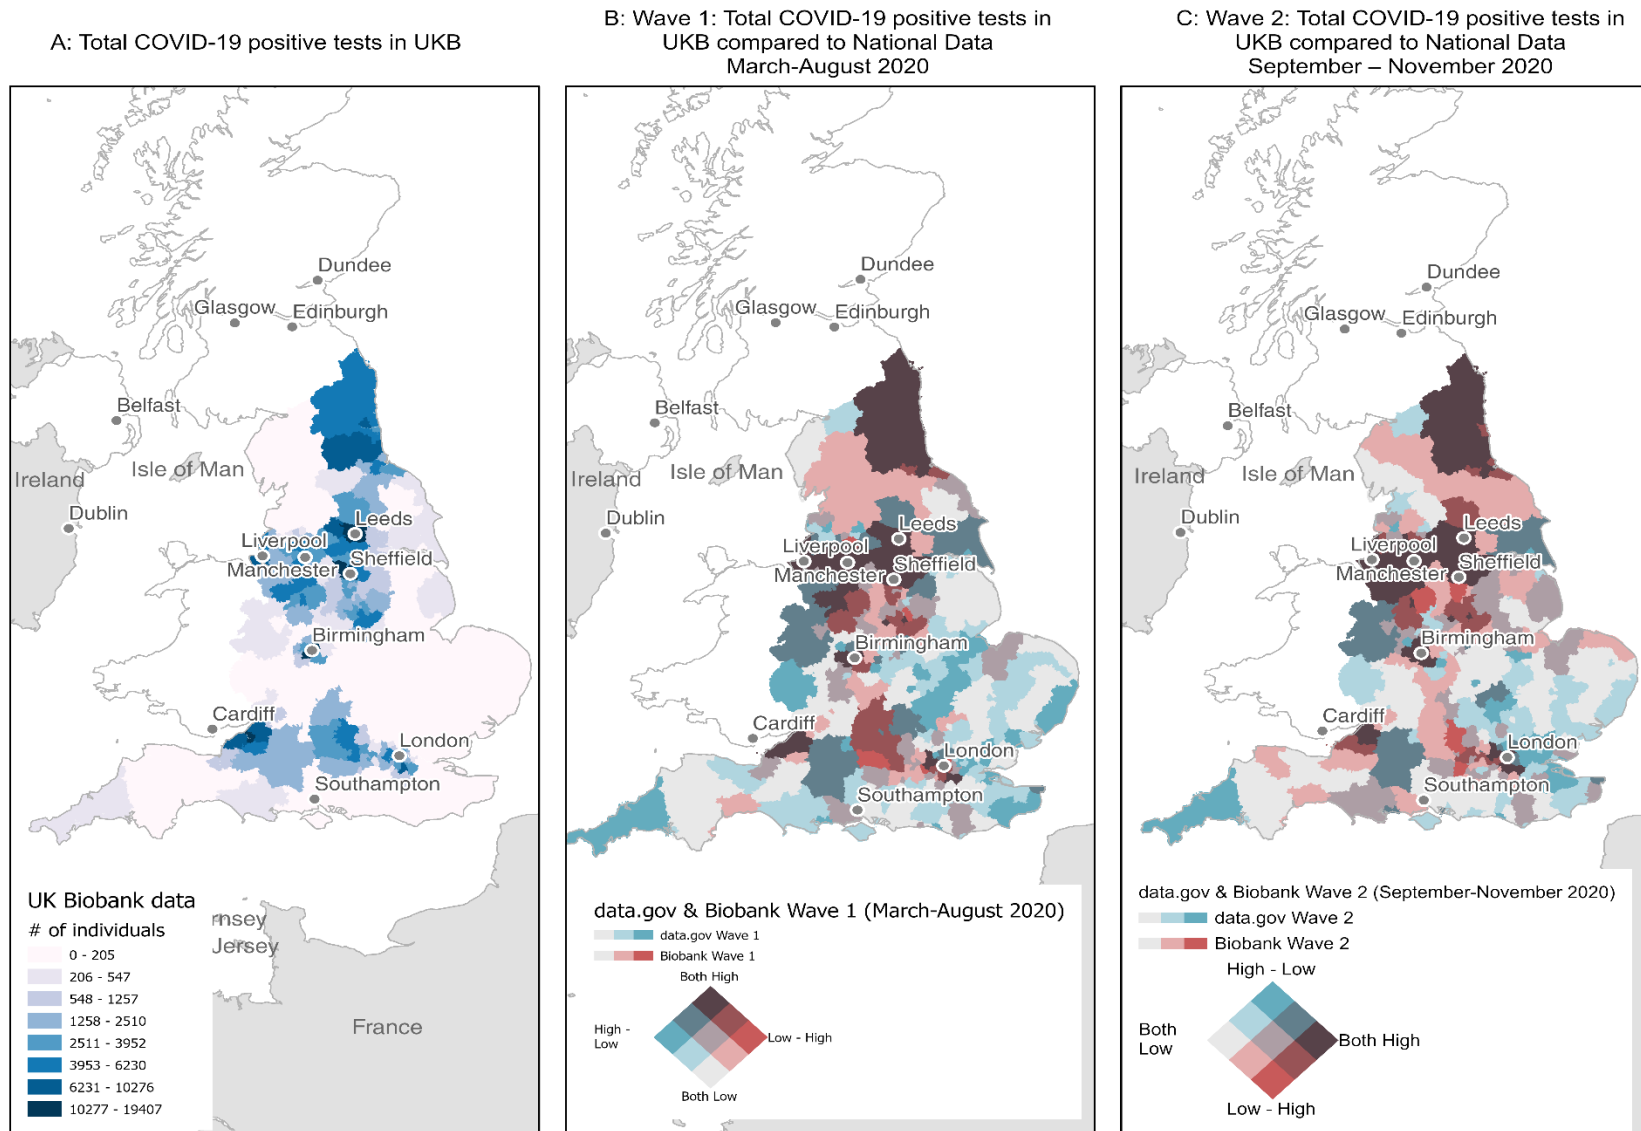



\* The UKB geo-data and National (UK) COVID-19 surveillance data was imported, projected, and converted to be compatible with each other in ArcGIS for visual inspection (see COVID-19 exposure in Materials and Methods section for more details). **Wave 1:** Total positive tests for March-August 2020; **Wave 2:** Total positive tests for September – November 2020; Source: UKB and <https://coronavirus.data.gov.uk/> accessed April 4, 2021.
